# 1 **COVID-19 onset reduced the sex ratio at birth in**

## 2 **South Africa**

3

4 Gwinyai Masukume<sup>1,\*</sup>, Margaret Ryan<sup>2</sup>, Rumbidzai Masukume<sup>3</sup>, Dorota Zammit<sup>4</sup>, Victor  
5 Grech<sup>1</sup>, Witness Mapanga<sup>5,6</sup>

6

7 <sup>1</sup>Academic Department of Paediatrics, Medical School, Mater Dei Hospital, Malta

8 <sup>2</sup>School of Social Work and Social Policy, Trinity College Dublin, Dublin, Ireland

9 <sup>3</sup>Department of Obstetrics and Gynaecology, Faculty of Health Sciences, University of the  
10 Witwatersrand, Johannesburg, South Africa

11 <sup>4</sup>National Statistics Office, Malta

12 <sup>5</sup>Noncommunicable Diseases Research Division, Wits Health Consortium (PTY) Ltd,  
13 Johannesburg, South Africa

14 <sup>6</sup>Division of Medical Oncology, Department of Medicine, School of Clinical Medicine,  
15 Faculty of Health Sciences, University of the Witwatersrand, Johannesburg, South Africa

16

17

18 \* parturitions@gmail.com

19

20

21

22

23

24

## 25 **Abstract**

## 26 **Background**

27 The sex ratio at birth [defined as male/(male+female) live births] is anticipated to  
28 approximate 0.510 with a slight male excess. Following sudden unexpected stressful events,  
29 this ratio has been observed to decrease transiently around 3-5 months following such events.  
30 We hypothesised that stress engendered by the onset of the COVID-19 pandemic may have  
31 caused such a decrease in South Africa 3-5 months after March 2020 since in this month,  
32 South Africa reported its first COVID-19 case, death and nationwide lockdown restrictions  
33 were instituted.

## 34 **Methods**

35 We used publicly available recorded monthly live birth data from Statistics South Africa. The  
36 most recent month for which data was available publicly was December 2020. We analysed  
37 live births for a 100-month period from September 2012 to December 2020, taking  
38 seasonality into account. Chi-squared tests were applied.

## 39 **Results**

40 Over this 100-month period, there were 8,151,364 live births. The lowest recorded monthly  
41 sex ratio at birth of 0.499 was in June 2020, 3 months after March 2020. This June was the  
42 only month during this period where the sex ratio inverted i.e., fewer male live births  
43 occurred. The predicted June 2020 ratio was 0.504. The observed June 2020 decrease was  
44 statistically significant  $p = 0.045$ .

## 45 **Conclusions**

46 The sex ratio at birth decreased and inverted in South Africa in June 2020, for the first time,  
47 during the most recent 100-month period. This decline occurred 3 months after the March

48 2020 onset of COVID-19 in South Africa. As June 2020 is within the critical window when  
49 population stressors are known to impact the sex ratio at birth, these findings suggest that the  
50 onset of the COVID-19 pandemic engendered population stress with notable effects on  
51 pregnancy and public health in South Africa. These findings have implications for future  
52 pandemic preparedness and social policy.

53

54

55

56

57

58

59

60

61

62

63

64

65

66

## 67 **Introduction**

68 The sex ratio at birth (SRB) also known as the secondary sex ratio is defined as  
69  $[\text{male}/(\text{male}+\text{female}) \text{ live births}]$  [1]. At population level it approximates 0.510 with male  
70 live births slightly exceeding female live births. The SRB may act as a sentinel health  
71 indicator underscoring adverse circumstances through its decrease, but also highlighting  
72 improved circumstances with its increase [2, 3]. Following sudden unexpected stressful  
73 events, the population SRB has been observed to decrease transiently usually some 3-5  
74 months following events such as the death of a highly popular public figure [4], terrorist  
75 attacks [5] and wide spread protesting/rioting [6]. Such stressful life events impact on  
76 maternal neuroimmunoendocrine condition; male fetuses are more vulnerable to such  
77 changes in condition [7]. Another potential window is 9 months after such events as was the  
78 case in Japan when the SRB dipped 9 months after the Kobe earthquake [8]. However, these  
79 windows of SRB decline are not a universal phenomenon due to varying contextual factors  
80 [9, 10].

81 It has been proposed that COVID-19 stress might result in SRB decline [11]. In March 2020,  
82 South Africa reported its first known polymerase chain reaction (PCR) confirmed COVID-19  
83 case [12]. During that same month the World Health Organization declared COVID-19 to be  
84 a pandemic [13], and this was accompanied by a surge in local and global media attention on  
85 COVID-19 [14]. In addition, during March 2020, South Africa declared a national state of  
86 disaster and instituted nationwide lockdown measures which included school closures, and  
87 restrictions on gatherings, domestic and international travel [15]. Furthermore, the first death  
88 attributed to COVID-19, in South Africa also occurred [16]. In short, March 2020 was a  
89 momentous month in relation to COVID-19 in South Africa.

90 Our primary hypothesis was that stress engendered by the onset of the COVID-19 pandemic  
91 might have caused a transient decrease in SRB in South Africa 3-5 months after March 2020.  
92 The secondary hypothesis was that an SRB dip occurred 9 months later, in December 2020.

93

## 94 **Materials and Methods**

### 95 **Data and statistical analysis**

96 Monthly male and female recorded live births, from the national birth registration system,  
97 were obtained from Statistics South Africa's publicly available annual reports [17]. For the  
98 intercensal period 2011–2016, completeness of birth registration was estimated at 88.6%.  
99 Data was extracted for a 100-month period from September 2012 to December 2020. The last  
100 year the SRB, in South Africa, was known to have been influenced by an event was in 2011  
101 [18]. December 2020 was the most recent month for which data was available. We conducted  
102 post-hoc analysis considering 3-5 and 9 months after the April 2015 protests/riots [19], as the  
103 SRB might have been affected consequent to stress induced by this event.  
104 To take seasonality into account, similar months across the years were compared. Restriction  
105 [20] was used to control for potential confounding factors. Chi-squared tests were used. This  
106 methodology is an alternative to time series analysis that has previously been used with  
107 similar South African data [21].  $P < 0.05$  was considered to be statistically significant. For  
108 analysis, Stata version 17BE (College Station, TX) was used.

109

### 110 **Ethical considerations**

111 Due to the anonymized nature of the data, ethical approval was not required.

112

## 113 **Results**

114 Over this 100-month period, from September 2012 to December 2020, there were a total of  
115 8,151,364 live births as 4,113,288 males and 4,038,076 females, SRB 0.505. The lowest  
116 recorded monthly sex ratio at birth, during the 100-month period, was in June 2020 at 0.499  
117 (Fig 1). June 2020 was also the only month during this most recent 100-month span that the  
118 SRB inverted i.e., fewer male than female live births occurred. The SRB for December 2020  
119 was 0.503. Based on similar months in previous years, the moving average approach  
120 predicted an SRB of 0.504 for June 2020 (Fig 2) and 0.505 for December 2020 respectively.  
121 The June 2020 SRB decrease was statistically significant  $p = 0.045$ , while for December  
122 2020 there was no statistically significant change  $p = 0.293$  (Table 1). Post-hoc analysis, S1  
123 Table, revealed no statistically significant result.  
124

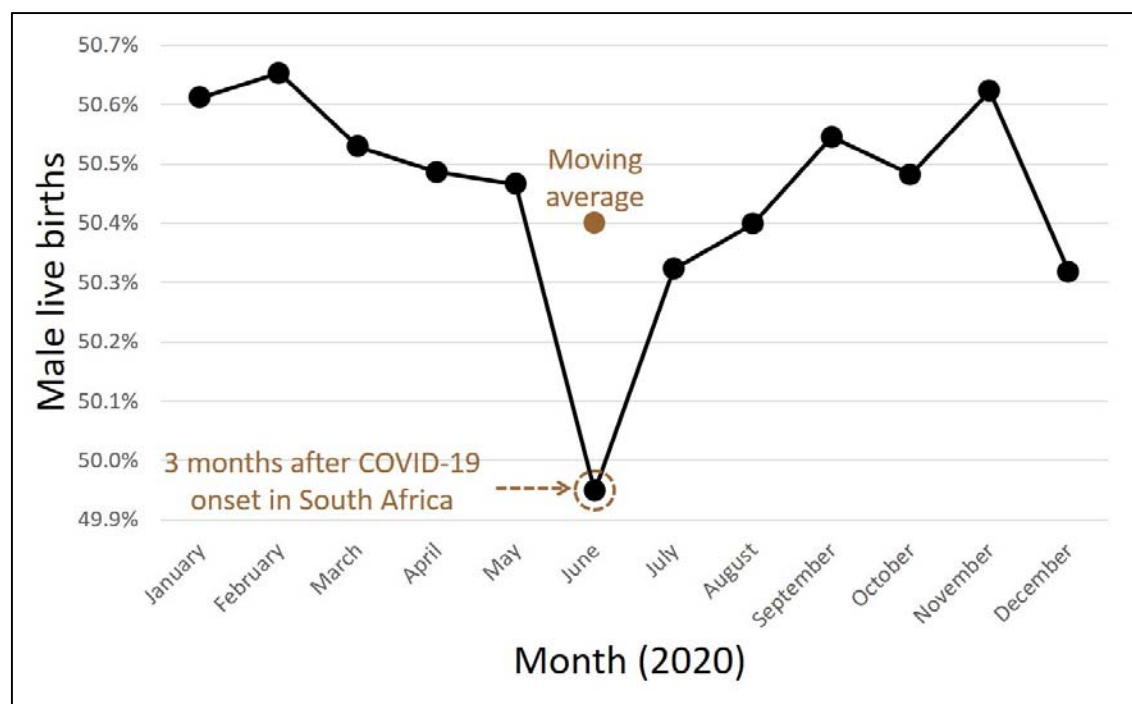

125  
126 **Fig 1. Monthly proportion of male live births in 2020.**

127

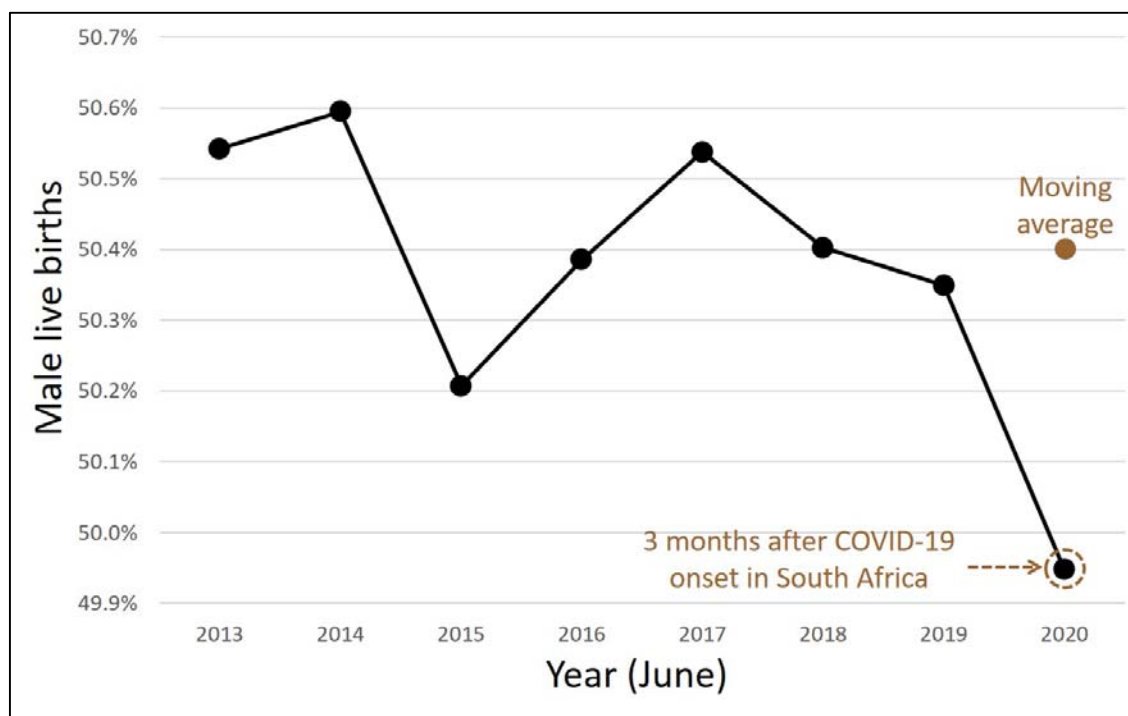

128

129 **Fig 2. Proportion of male live births during the month of June from 2013-2020.**

130

131 **Table 1. Sex ratio at birth restricted from 2018-2020.**

| Period               | Male live births                | Female live births | Sex ratio at birth |
|----------------------|---------------------------------|--------------------|--------------------|
| June 2018 + 2019     | 81,078                          | 79,870             | 0.504              |
| June 2020            | 42,022                          | 42,109             | 0.499              |
|                      | Pearsons's Chi-squared = 4.0292 |                    |                    |
|                      | P = 0.045                       |                    |                    |
| December 2018 + 2019 | 81,237                          | 79,495             | 0.505              |
| December 2020        | 41,795                          | 41,268             | 0.503              |
|                      | Pearsons's Chi-squared = 1.1058 |                    |                    |
|                      | P = 0.293                       |                    |                    |

132

## 133 Discussion

134 In this study, we provide insight into how the SRB, in South Africa, was influenced by the  
135 onset of the COVID-19 pandemic. Over the study period of 100 months, we observed the  
136 lowest SRB of 0.499 in June 2020, 3 months after the first COVID-19 case, death and  
137 lockdown occurred in March 2020. Notably, the SRB had inverted i.e. fewer male live births  
138 occurred. This is the only month this happened during the 100-month period, from September  
139 2012 through to December 2020. Our findings are inline with the hypothesis that COVID-19  
140 stress would result in SRB decline [11], driven by the Trivers-Willard hypothesis which  
141 posits that adverse environmental conditions can lower the ratio of males to females [22]. Our  
142 findings are also consistent with studies that have reported a transient SRB decline 3-5  
143 months following unexpected events which stressed populations acutely and severely [4-6].  
144 Although an SRB decline has been reported 9 months after an acute unanticipated severe  
145 stressor [8], we did not find evidence of this in South Africa, and the SRB, in December  
146 2020, was not appreciably different in comparison to previous Decembers.

147 The timing of the SRB dip, 3 months following the onset of COVID-19 in South Africa  
148 suggests a mechanism operating in ongoing pregnancies whereby, due to stress, there is an  
149 elevated risk of fetal death among males [23] resulting in fewer live born males. Thus beyond  
150 the direct adverse effects of the pandemic pathogen on pregnant women evidenced by a  
151 higher maternal mortality rate among women admitted with SARS-CoV-2 infection [24],  
152 anxiety and stress likely generated by news of the impending pandemic [14], in March 2020,  
153 led to disproportionate male fetal loss in June 2020. Triangulation with antepartum deaths  
154 from South Africa's perinatal mortality audit system, when the data becomes publicly  
155 available, would be needed to directly confirm this excess male fetal loss [25]. Had a dip



156 been witnessed in December 2020, 9 months after the onset of COVID-19, this would have  
157 pointed to a conception mechanism.

158

159 It is plausible that the June 2020 SRB decline could have been attributed to an event  
160 approximately 9 months earlier [8], in September 2019. Indeed there were protests/riots  
161 during that September which garnered significant media attention [26]. However, several  
162 factors are not consistent with this paradigm of the South African June 2020 SRB decrease  
163 being primarily related to September 2019 events. First, there is the precedent of the Los  
164 Angeles protests/riots [6] where the SRB perturbation occurred during the 3-5 month post-  
165 event window. Second, similar protests/riots to the aforementioned ones have occurred before  
166 in South Africa during the most recent 100-month period, in April 2015 [19], but with no  
167 significant SRB decline either 3-5 or 9 months later (post-hoc analysis). Third, contrary to  
168 COVID-19, which had broader nationwide ramifications, these protests [6, 19, 27] were  
169 confined to certain locations with possibly more localised effects.

170

171 Ecological fallacy, the limited ability to extrapolate findings to the individual level applies to  
172 this study [28]. Nonetheless, the ecologic study technique is arguably best suited to  
173 investigate how a population outcome is influenced by a population stressor [29]. In late  
174 March 2020, due to the institution of nationwide lockdown measures, the Department of  
175 Home Affairs (DHA) only offered limited civic services. Due to this, there was a decline in  
176 the number of live births registered early (< 30 days). With the easing of restrictions, services  
177 resumed in early May 2020. In 2020, there was an overall compensatory increase in the  
178 number of live births registered late (> 30 days) [17]. The neonatal mortality rate, death  
179 within the first 28 completed days of life, in South Africa approximates 12 deaths per 1,000

180 live births [30]. Nonetheless, the total recorded live births for 2020 is inline with prior years.  
181 Overall, this means when restrictive measures were lifted those who had missed registering a  
182 live birth came forward. Thus the present analysis is unlikely to have been affected by closure  
183 of the DHA offices necessitated by lockdown regulations.

184 The present analysis covers the first COVID-19 wave in South Africa. At the time of writing,  
185 South Africa had experienced four waves [31]. It is possible that the SRB may have been  
186 transiently perturbed in the following waves. This is an area for research when the recorded  
187 live birth data for these periods becomes available.

188

## 189 **Conclusions**

190 The sex ratio at birth decreased and inverted in South Africa in June 2020, for the first time,  
191 during the most recent 100-month period. This decline occurred 3 months after the March  
192 2020 onset of COVID-19 in South Africa. As June 2020 is within the critical window when  
193 population stressors are known to impact the sex ratio at birth, via elevated risk of fetal death  
194 among males, these findings suggest that the onset of the COVID-19 pandemic engendered  
195 population stress with notable effects on pregnancy and public health in South Africa. Our  
196 findings can help inform future pandemic preparedness [32] and social policy [33]. Whether  
197 other countries experienced a decline in the SRB, following the onset of COVID-19 is an area  
198 for future research.

199

## 200 **Acknowledgements**

201 We acknowledge Statistics South Africa for the recorded live birth data.

202

## 203 **Funding**

204 None

205

## 206 **Competing interests**

207 None declared

208

## 209 **Author Contributions**

210 Conceptualization: GM, MR, RM, DZ, VG, WM

211 Data curation: MR, GM

212 Formal analysis: GM, DZ

213 Writing – original draft: GM

214 Writing – review & editing: MR, RM, GM, DZ, VG, WM

215

## 216 **References**

217 1. Grech V. Secular trends in newborn sex ratios. *Early Hum Dev.* 2014;90(11):755-60.

218 2. Davis DL, Gottlieb MB, Stampnitzky JR. Reduced ratio of male to female births in  
219 several industrial countries: a sentinel health indicator? *Jama.* 1998;279(13):1018-23.

220 3. Grech V, Masukume G. The sex ratio at birth in South Africa may be a sentinel health  
221 indicator. *Early Hum Dev.* 2016;103:225-7.

- 222 4. Grech V. Historic Royal events and the male to female ratio at birth in the United  
223 Kingdom. *Eur J Obstet Gynecol Reprod Biol.* 2015;191:57-61.
- 224 5. Masukume G, O'Neill SM, Khashan AS, Kenny LC, Grech V. The Terrorist Attacks  
225 and the Human Live Birth Sex Ratio: a Systematic Review and Meta-Analysis. *Acta Medica*  
226 *(Hradec Kralove).* 2017;60(2):59-65.
- 227 6. Grech V. Terrorist attacks and the male-to-female ratio at birth: The Troubles in  
228 Northern Ireland, the Rodney King riots, and the Breivik and Sandy Hook shootings. *Early*  
229 *Hum Dev.* 2015;91(12):837-40.
- 230 7. James WH, Grech V. A review of the established and suspected causes of variations  
231 in human sex ratio at birth. *Early Hum Dev.* 2017;109:50-6.
- 232 8. Fukuda M, Fukuda K, Shimizu T, Møller H. Decline in sex ratio at birth after Kobe  
233 earthquake. *Hum Reprod.* 1998;13(8):2321-2.
- 234 9. Bruckner TA, Lebreton É, Perrone N, Mortensen LH, Blondel B. Preterm birth and  
235 selection in utero among males following the November 2015 Paris attacks. *Int J Epidemiol.*  
236 2019;48(5):1614-22.
- 237 10. Grech V, Scherb H. No local birth sex ratio changes following the August 2019  
238 shootings in Montgomery county, Ohio and in El Paso county, Texas. *Med Princ Pract.* 2021.
- 239 11. Abdoli A. The COVID-19 stress may influence on the sex ratio at birth. *J Matern*  
240 *Fetal Neonatal Med.* 2020:1-6.
- 241 12. Jassat W, Mudara C, Ozougwu L, Tempia S, Blumberg L, Davies MA, et al.  
242 Difference in mortality among individuals admitted to hospital with COVID-19 during the  
243 first and second waves in South Africa: a cohort study. *Lancet Glob Health.* 2021;9(9):e1216-  
244 e25.
- 245 13. Cucinotta D, Vanelli M. WHO Declares COVID-19 a Pandemic. *Acta Biomed.*  
246 2020;91(1):157-60.

- 247 14. Ng R, Chow TYJ, Yang W. News media narratives of Covid-19 across 20 countries:  
248 Early global convergence and later regional divergence. *PLoS One*. 2021;16(9):e0256358.
- 249 15. Abdool Karim SS. The South African Response to the Pandemic. *N Engl J Med*.  
250 2020;382(24):e95.
- 251 16. Pillay-van Wyk V, Bradshaw D, Groenewald P, Seocharan I, Manda S, Roomaney  
252 RA, et al. COVID deaths in South Africa: 99 days since South Africa's first death. *S Afr Med*  
253 *J*. 2020;110(11):1093-9.
- 254 17. Statistics South Africa. Recorded live births 2020. Pretoria 2021.
- 255 18. Masukume G, Grech V. The sex ratio at birth in South Africa increased 9months after  
256 the 2010 FIFA World Cup. *Early Hum Dev*. 2015;91(12):807-9.
- 257 19. Desai A. Migrants and violence in South Africa: The April 2015 xenophobic attacks  
258 in Durban. *The Oriental Anthropologist*. 2015;15(2):247-59.
- 259 20. Howards PP. An overview of confounding. Part 1: the concept and how to address it.  
260 *Acta Obstet Gynecol Scand*. 2018;97(4):394-9.
- 261 21. Masukume G, Grech V, Scherb H. Reply: Analysis of the sex ratio at birth in South  
262 Africa increased 9months after the 2010 FIFA World Cup. *Early Hum Dev*. 2016;97:11-3.
- 263 22. Trivers RL, Willard DE. Natural selection of parental ability to vary the sex ratio of  
264 offspring. *Science*. 1973;179(4068):90-2.
- 265 23. Catalano R, Bruckner T, Anderson E, Gould JB. Fetal death sex ratios: a test of the  
266 economic stress hypothesis. *Int J Epidemiol*. 2005;34(4):944-8.
- 267 24. Budhram S, Vannevel V, Botha T, Chauke L, Bhoora S, Balie GM, et al. Maternal  
268 characteristics and pregnancy outcomes of hospitalized pregnant women with SARS-CoV-2  
269 infection in South Africa: An International Network of Obstetric Survey Systems-based  
270 cohort study. *Int J Gynaecol Obstet*. 2021.

- 271 25. Lavin T, Allanson ER, Nedkoff L, Preen DB, Pattinson RC. Applying the  
272 international classification of diseases to perinatal mortality data, South Africa. *Bull World*  
273 *Health Organ.* 2018;96(12):806-16.
- 274 26. Tarisayi KS, Manik S. An unabating challenge: Media portrayal of xenophobia in  
275 South Africa. *Cogent Arts & Humanities.* 2020;7(1):1859074.
- 276 27. Mavunga G. # FeesMustFall protests in South Africa: A critical realist analysis of  
277 selected newspaper articles. *Journal of Student Affairs in Africa.* 2019;7(1):81-99.
- 278 28. Hart J. On ecological studies: a short communication. *Dose Response.* 2011;9(4):497-  
279 501.
- 280 29. Pearce N. Epidemiology in a changing world: variation, causation and ubiquitous risk  
281 factors. *Int J Epidemiol.* 2011;40(2):503-12.
- 282 30. Damian DJ, Njau B, Lisasi E, Msuya SE, Boulle A. Trends in maternal and neonatal  
283 mortality in South Africa: a systematic review. *Syst Rev.* 2019;8(1):76.
- 284 31. Mahase E. Omicron: South Africa says fourth wave peak has passed as it lifts curfew.  
285 *Bmj.* 2022;376:o7.
- 286 32. Marston HD, Paules CI, Fauci AS. The Critical Role of Biomedical Research in  
287 Pandemic Preparedness. *Jama.* 2017;318(18):1757-8.
- 288 33. Cook S, Ulriksen MS. Social policy responses to COVID-19: New issues, old  
289 solutions? *Global Social Policy.* 2021;21(3):381-95.

290

291

292

293

294

295

296 **S1 Table. Sex ratio at birth restricted from 2013-2016.**

| <b>Period</b>       | <b>Male live births</b>                      | <b>Female live births</b> | <b>Sex ratio at birth</b> |
|---------------------|----------------------------------------------|---------------------------|---------------------------|
| August 2013 + 2014  | 87,302                                       | 85,901                    | 0.504                     |
| August 2015         | 40,335                                       | 39,777                    | 0.503                     |
|                     | Pearsons's Chi-squared = 0.0691<br>P = 0.793 |                           |                           |
| January 2014 + 2015 | 90,339                                       | 88,510                    | 0.505                     |
| January 2016        | 39,756                                       | 38,441                    | 0.508                     |
|                     | Pearsons's Chi-squared = 2.3632<br>P = 0.124 |                           |                           |

297
